# Supplementary material
Source: publisher figshare collection journal article supplement (https://tandf.figshare.com/ndownloader/files/20999667)
Supplement: Supplementary file 1 [file 20999667]

Appendix 2: Langmuir Isotherms parameters of the total REE for resins studied at different pH.

| Isotherms | pH | Resin | Parameters | Total REE |
| --- | --- | --- | --- | --- |
| Langmuir | 1.4 | Dowex 50WX8 | qmax (mmol g-1) | 0.966 |
| b (L mmol-1) | 11.60 |
| RL | 0.039 |
| R2 | 0.944 |
| Purolite C160 | qmax (mmol g-1) | 1.010 |
| b (L mmol-1) | 3.57 |
| RL | 0.118 |
| R2 | 0.993 |
| MDS 200 H | qmax (mmol g-1) | 0.922 |
| b (L mmol-1) | 13.02 |
| RL | 0.035 |
| R2 | 0.937 |
| Langmuir | 2.4 | Dowex 50WX8 | qmax (mmol g-1) | 0.890 |
| b (L mmol-1) | 13.53 |
| RL | 0.035 |
| R2 | 0.950 |
| Purolite C160 | qmax (mmol g-1) | 0.964 |
| b (L mmol-1) | 3.090 |
| RL | 0.138 |
| R2 | 0.997 |
| MDS 200 H | qmax (mmol g-1) | 0.903 |
| b (L mmol-1) | 11.06 |
| RL | 0.043 |
| R2 | 0.957 |
|  |  |  |  |  |

| (Continued) |  |  |  |  |
| --- | --- | --- | --- | --- |
| Isotherms | pH | Resin | Parameters | Total REE |
| Langmuir | 3.4 | Dowex 50WX8 | qmax (mmol g-1) | 0.833 |
| b (L mmol-1) | 13.11 |
| RL | 0.035 |
| R2 | 0.950 |
| Purolite C160 | qmax (mmol g-1) | 0.837 |
| b (L mmol-1) | 3.892 |
| RL | 0.110 |
| R2 | 0.988 |
| MDS 200 H | qmax (mmol g-1) | 0.842 |
| b (L mmol-1) | 11.48 |
| RL | 0.040 |
| R2 | 0.959 |
